# Supplementary material for: Twenty Years of Insulin Gla-100: A Systematic Evaluation of Its Efficacy and Safety in Type 2 Diabetes Mellitus
Source: Springer Nature journal article supplement (doi:10.1007/s13300-022-01284-2), 2022-06-30
Supplement: MOESM1 [file 23224050]

## **Supplementary Material**

### **Twenty Years of Insulin Gla-100 – A Systematic Evaluation of its Efficacy and Safety in T2DM**

Bipin Sethi<sup>1</sup>, AG Unnikrishnan<sup>2</sup>, Vageesh Ayyar<sup>3</sup>, PK Jabbar<sup>4</sup>, KK Ganguly<sup>5</sup>, Sudhir Bhandari<sup>6</sup>, Ashu Rastogi<sup>7</sup>, Rajarshi Mukherjee<sup>8</sup>, Vivek Sundaram<sup>9</sup>, Adlyne R Asirvatham<sup>10</sup>

<sup>1</sup>Head, Department of Endocrinology, Care Hospitals, Hyderabad; <sup>2</sup>Head, Department of Endocrinology, Chellaram Diabetes Institute, Pune; <sup>3</sup>Professor and Head, Department of Endocrinology, St. John's Hospital, Bangalore; <sup>4</sup>Head, Department of Endocrinology, Medical College, Trivandrum; <sup>5</sup>Senior Consultant, Department of Endocrinology, Peerless Hospital, Kolkata; <sup>6</sup>Senior Professor, Principal and Controller, SMS Medical College and Hospital, Jaipur; <sup>7</sup>Assistant Professor, Department of Endocrinology and Metabolism, Postgraduate Institute of Medical Education and Research (PGIMER), Chandigarh; <sup>8</sup>Consultant Endocrinologist, Astha Medical Center, Durgapur; <sup>9</sup>Consultant, Department of Diabetes and Internal Medicine, Sundaram Hospital, Trichy; <sup>10</sup>Consultant and Associate Professor, Department of Endocrinology, Sri Ramachandra Medical College, Chennai.

**Corresponding author:** Dr. Bipin Sethi Email – [endoinformationcre@gmail.com](mailto:endoinformationcre@gmail.com)

**Table S1: Search Strategy**

| Database | Search string                                                                                                                                                                                                                                                                                                                                                                                                                                                                                                                                                                                                                                                                                                                                                                                                                                                                                                                                                                                                                                                                                                                                                                                                                                                                                                                                                                                                                                                                                                                                                                                                                                                                                                                       |    |        |    |                                                           |    |                                                    |    |                      |    |                                                                |    |                                                        |    |                                                |    |                                              |    |                 |    |                                        |     |                                                                      |     |                                                              |
|----------|-------------------------------------------------------------------------------------------------------------------------------------------------------------------------------------------------------------------------------------------------------------------------------------------------------------------------------------------------------------------------------------------------------------------------------------------------------------------------------------------------------------------------------------------------------------------------------------------------------------------------------------------------------------------------------------------------------------------------------------------------------------------------------------------------------------------------------------------------------------------------------------------------------------------------------------------------------------------------------------------------------------------------------------------------------------------------------------------------------------------------------------------------------------------------------------------------------------------------------------------------------------------------------------------------------------------------------------------------------------------------------------------------------------------------------------------------------------------------------------------------------------------------------------------------------------------------------------------------------------------------------------------------------------------------------------------------------------------------------------|----|--------|----|-----------------------------------------------------------|----|----------------------------------------------------|----|----------------------|----|----------------------------------------------------------------|----|--------------------------------------------------------|----|------------------------------------------------|----|----------------------------------------------|----|-----------------|----|----------------------------------------|-----|----------------------------------------------------------------------|-----|--------------------------------------------------------------|
| PubMed   | ((((((((Maturity onset diabet* OR Stable diabet* OR Slow onset diabet* OR Adult onset diabet*))) OR (("non-insulin dependent diabetes mellitus" OR NIDDM OR noninsulin dependent diabet*)) OR ("diabetes mellitus type 2" OR T2DM OR T2D OR Type II diabet* OR Type 2 diabet*)) OR "diabetes mellitus, type 2"[MeSH Terms])) AND (((((((("insulin glargine"[MeSH Terms] OR ("insulin glargine" OR (Insulin and Glargine))) OR (glargin* OR lantus OR Gla-100 OR Gla100 OR (glargine and U100))) OR "insulin, long-acting"[MeSH Terms] OR ("Long-acting insulin" OR "Long acting Insulin" OR ("Long acting" OR "Long-acting") AND Insulin)))) OR "Basal Insulin")) OR ("Insulin Analogue" OR "Insulin Analog")))) NOT ((Editorial[Publication Type] OR (Case report[Text Word] OR Letter[Publication Type])))                                                                                                                                                                                                                                                                                                                                                                                                                                                                                                                                                                                                                                                                                                                                                                                                                                                                                                                        |    |        |    |                                                           |    |                                                    |    |                      |    |                                                                |    |                                                        |    |                                                |    |                                              |    |                 |    |                                        |     |                                                                      |     |                                                              |
| Embase   | (((('insulin glargine':ab,ti OR (glargine OR lantus OR 'gla 100' OR gla100:ab,ti) OR ('glargine'/exp OR 'glargine':ab,ti) OR ('glargine' AND 'u100') OR ('glargine' AND 'u-100') OR ('long acting insulin'/exp OR 'long acting insulin':ab,ti) OR 'long-acting insulin':ab,ti OR ('long acting' AND 'insulin':ab,ti) OR ('basal insulin'/exp OR 'basal insulin':ab,ti) OR ('insulin analogue' OR 'insulin analog':ab,ti)) AND (('diabetes mellitus, type 2'/exp OR 'diabetes mellitus, type 2':ab,ti) OR ('diabetes mellitus type 2' OR 't2dm' OR 't2d' OR 'type ii diabetes' OR 'type 2 diabetes':ab,ti) OR ('non-insulin dependent diabetes mellitus' OR 'niddm' OR 'noninsulin dependent diabetes':ab,ti) OR ('maturity onset diabet*' OR 'stable diabet*' OR 'slow onset diabet*' OR 'adult onset diabet*':ab,ti))) NOT ('case report' OR 'letter' OR 'comment' OR 'editorial' OR 'historical article':it)) AND [humans]/lim AND [english]/lim                                                                                                                                                                                                                                                                                                                                                                                                                                                                                                                                                                                                                                                                                                                                                                                  |    |        |    |                                                           |    |                                                    |    |                      |    |                                                                |    |                                                        |    |                                                |    |                                              |    |                 |    |                                        |     |                                                                      |     |                                                              |
| Cochrane | <table border="0"> <tr> <td data-bbox="434 932 495 963">ID</td> <td data-bbox="495 932 1899 963">Search</td> </tr> <tr> <td data-bbox="434 963 495 995">#1</td> <td data-bbox="495 963 1899 995">("insulin glargine") (Word variations have been searched)</td> </tr> <tr> <td data-bbox="434 995 495 1027">#2</td> <td data-bbox="495 995 1899 1027">MeSH descriptor: [Insulin Glargine] this term only</td> </tr> <tr> <td data-bbox="434 1027 495 1059">#3</td> <td data-bbox="495 1027 1899 1059">Insulin and Glargine</td> </tr> <tr> <td data-bbox="434 1059 495 1091">#4</td> <td data-bbox="495 1059 1899 1091">glargine or lantus or (glargine and U100) or Gla-100 or Gla100</td> </tr> <tr> <td data-bbox="434 1091 495 1123">#5</td> <td data-bbox="495 1091 1899 1123">MeSH descriptor: [Insulin, Long-Acting] this term only</td> </tr> <tr> <td data-bbox="434 1123 495 1155">#6</td> <td data-bbox="495 1123 1899 1155">"Long-acting insulin" or "Long acting Insulin"</td> </tr> <tr> <td data-bbox="434 1155 495 1187">#7</td> <td data-bbox="495 1155 1899 1187">("Long acting" or "Long-acting") AND Insulin</td> </tr> <tr> <td data-bbox="434 1187 495 1219">#8</td> <td data-bbox="495 1187 1899 1219">"Basal Insulin"</td> </tr> <tr> <td data-bbox="434 1219 495 1251">#9</td> <td data-bbox="495 1219 1899 1251">"Insulin Analogue" or "Insulin Analog"</td> </tr> <tr> <td data-bbox="434 1251 495 1283">#10</td> <td data-bbox="495 1251 1899 1283">(#1) or (#2) or (#3) or (#4) or (#5) or (#6) or (#7) or (#8) or (#9)</td> </tr> <tr> <td data-bbox="434 1283 495 1315">#11</td> <td data-bbox="495 1283 1899 1315">(#1) or (#2) or (#3) or (#4) or (#5) or (#6) or (#7) or (#9)</td> </tr> </table> | ID | Search | #1 | ("insulin glargine") (Word variations have been searched) | #2 | MeSH descriptor: [Insulin Glargine] this term only | #3 | Insulin and Glargine | #4 | glargine or lantus or (glargine and U100) or Gla-100 or Gla100 | #5 | MeSH descriptor: [Insulin, Long-Acting] this term only | #6 | "Long-acting insulin" or "Long acting Insulin" | #7 | ("Long acting" or "Long-acting") AND Insulin | #8 | "Basal Insulin" | #9 | "Insulin Analogue" or "Insulin Analog" | #10 | (#1) or (#2) or (#3) or (#4) or (#5) or (#6) or (#7) or (#8) or (#9) | #11 | (#1) or (#2) or (#3) or (#4) or (#5) or (#6) or (#7) or (#9) |
| ID       | Search                                                                                                                                                                                                                                                                                                                                                                                                                                                                                                                                                                                                                                                                                                                                                                                                                                                                                                                                                                                                                                                                                                                                                                                                                                                                                                                                                                                                                                                                                                                                                                                                                                                                                                                              |    |        |    |                                                           |    |                                                    |    |                      |    |                                                                |    |                                                        |    |                                                |    |                                              |    |                 |    |                                        |     |                                                                      |     |                                                              |
| #1       | ("insulin glargine") (Word variations have been searched)                                                                                                                                                                                                                                                                                                                                                                                                                                                                                                                                                                                                                                                                                                                                                                                                                                                                                                                                                                                                                                                                                                                                                                                                                                                                                                                                                                                                                                                                                                                                                                                                                                                                           |    |        |    |                                                           |    |                                                    |    |                      |    |                                                                |    |                                                        |    |                                                |    |                                              |    |                 |    |                                        |     |                                                                      |     |                                                              |
| #2       | MeSH descriptor: [Insulin Glargine] this term only                                                                                                                                                                                                                                                                                                                                                                                                                                                                                                                                                                                                                                                                                                                                                                                                                                                                                                                                                                                                                                                                                                                                                                                                                                                                                                                                                                                                                                                                                                                                                                                                                                                                                  |    |        |    |                                                           |    |                                                    |    |                      |    |                                                                |    |                                                        |    |                                                |    |                                              |    |                 |    |                                        |     |                                                                      |     |                                                              |
| #3       | Insulin and Glargine                                                                                                                                                                                                                                                                                                                                                                                                                                                                                                                                                                                                                                                                                                                                                                                                                                                                                                                                                                                                                                                                                                                                                                                                                                                                                                                                                                                                                                                                                                                                                                                                                                                                                                                |    |        |    |                                                           |    |                                                    |    |                      |    |                                                                |    |                                                        |    |                                                |    |                                              |    |                 |    |                                        |     |                                                                      |     |                                                              |
| #4       | glargine or lantus or (glargine and U100) or Gla-100 or Gla100                                                                                                                                                                                                                                                                                                                                                                                                                                                                                                                                                                                                                                                                                                                                                                                                                                                                                                                                                                                                                                                                                                                                                                                                                                                                                                                                                                                                                                                                                                                                                                                                                                                                      |    |        |    |                                                           |    |                                                    |    |                      |    |                                                                |    |                                                        |    |                                                |    |                                              |    |                 |    |                                        |     |                                                                      |     |                                                              |
| #5       | MeSH descriptor: [Insulin, Long-Acting] this term only                                                                                                                                                                                                                                                                                                                                                                                                                                                                                                                                                                                                                                                                                                                                                                                                                                                                                                                                                                                                                                                                                                                                                                                                                                                                                                                                                                                                                                                                                                                                                                                                                                                                              |    |        |    |                                                           |    |                                                    |    |                      |    |                                                                |    |                                                        |    |                                                |    |                                              |    |                 |    |                                        |     |                                                                      |     |                                                              |
| #6       | "Long-acting insulin" or "Long acting Insulin"                                                                                                                                                                                                                                                                                                                                                                                                                                                                                                                                                                                                                                                                                                                                                                                                                                                                                                                                                                                                                                                                                                                                                                                                                                                                                                                                                                                                                                                                                                                                                                                                                                                                                      |    |        |    |                                                           |    |                                                    |    |                      |    |                                                                |    |                                                        |    |                                                |    |                                              |    |                 |    |                                        |     |                                                                      |     |                                                              |
| #7       | ("Long acting" or "Long-acting") AND Insulin                                                                                                                                                                                                                                                                                                                                                                                                                                                                                                                                                                                                                                                                                                                                                                                                                                                                                                                                                                                                                                                                                                                                                                                                                                                                                                                                                                                                                                                                                                                                                                                                                                                                                        |    |        |    |                                                           |    |                                                    |    |                      |    |                                                                |    |                                                        |    |                                                |    |                                              |    |                 |    |                                        |     |                                                                      |     |                                                              |
| #8       | "Basal Insulin"                                                                                                                                                                                                                                                                                                                                                                                                                                                                                                                                                                                                                                                                                                                                                                                                                                                                                                                                                                                                                                                                                                                                                                                                                                                                                                                                                                                                                                                                                                                                                                                                                                                                                                                     |    |        |    |                                                           |    |                                                    |    |                      |    |                                                                |    |                                                        |    |                                                |    |                                              |    |                 |    |                                        |     |                                                                      |     |                                                              |
| #9       | "Insulin Analogue" or "Insulin Analog"                                                                                                                                                                                                                                                                                                                                                                                                                                                                                                                                                                                                                                                                                                                                                                                                                                                                                                                                                                                                                                                                                                                                                                                                                                                                                                                                                                                                                                                                                                                                                                                                                                                                                              |    |        |    |                                                           |    |                                                    |    |                      |    |                                                                |    |                                                        |    |                                                |    |                                              |    |                 |    |                                        |     |                                                                      |     |                                                              |
| #10      | (#1) or (#2) or (#3) or (#4) or (#5) or (#6) or (#7) or (#8) or (#9)                                                                                                                                                                                                                                                                                                                                                                                                                                                                                                                                                                                                                                                                                                                                                                                                                                                                                                                                                                                                                                                                                                                                                                                                                                                                                                                                                                                                                                                                                                                                                                                                                                                                |    |        |    |                                                           |    |                                                    |    |                      |    |                                                                |    |                                                        |    |                                                |    |                                              |    |                 |    |                                        |     |                                                                      |     |                                                              |
| #11      | (#1) or (#2) or (#3) or (#4) or (#5) or (#6) or (#7) or (#9)                                                                                                                                                                                                                                                                                                                                                                                                                                                                                                                                                                                                                                                                                                                                                                                                                                                                                                                                                                                                                                                                                                                                                                                                                                                                                                                                                                                                                                                                                                                                                                                                                                                                        |    |        |    |                                                           |    |                                                    |    |                      |    |                                                                |    |                                                        |    |                                                |    |                                              |    |                 |    |                                        |     |                                                                      |     |                                                              |

| Database | Search string                                                                                                  |
|----------|----------------------------------------------------------------------------------------------------------------|
|          | #12 MeSH descriptor: [Diabetes Mellitus, Type 2] this term only                                                |
|          | #13 ("diabetes mellitus type 2" or T2DM or T2D or "Type II diabetes" or "Type 2 diabetes"):ti,ab,kw            |
|          | #14 ("non-insulin dependent diabetes mellitus" or NIDDM or "non insulin dependent diabetes mellitus"):ti,ab,kw |
|          | #15 "Maturity onset diabetes" or "Stable diabetes" or "Slow onset diabetes" or "Adult onset diabetes"          |
|          | #16 (#12) or (#13) or (#14) or (#15)                                                                           |
|          | #17 (#10) AND (#16) in Cochrane Reviews, Trials                                                                |
|          | #18 (#11) AND (#16) in Cochrane Reviews, Trials                                                                |

**Table S2. Response Rates (Initiation)**

| Author (year)           | Intervention                  | Proportion of patients achieving target HbA1c [n (if available)] (%) | Intergroup p-value | Proportion of patients achieving target FPG [n (if available)] (%) | Intergroup p-value | Proportion of patients achieving HbA1c with no confirmed hypoglycemia (%) | Intergroup p-value | Proportion of patients achieving HbA1c with no nocturnal hypoglycemia (%) | Intergroup p-value | Proportion of patients achieving FPG target with no confirmed nocturnal hypoglycemia (%) | Intergroup p-value | Proportion of patients achieving FPG with no nocturnal hypoglycemia (%) | Intergroup p-value | Treatment Satisfaction |                           |                      |
|-------------------------|-------------------------------|----------------------------------------------------------------------|--------------------|--------------------------------------------------------------------|--------------------|---------------------------------------------------------------------------|--------------------|---------------------------------------------------------------------------|--------------------|------------------------------------------------------------------------------------------|--------------------|-------------------------------------------------------------------------|--------------------|------------------------|---------------------------|----------------------|
|                         |                               |                                                                      |                    |                                                                    |                    |                                                                           |                    |                                                                           |                    |                                                                                          |                    |                                                                         |                    | Baseline score (SD)    | Post-treatment score (SD) | p-value (intergroup) |
| <b>Glargine vs. NPH</b> |                               |                                                                      |                    |                                                                    |                    |                                                                           |                    |                                                                           |                    |                                                                                          |                    |                                                                         |                    |                        |                           |                      |
| Fiesselmann, 2016 [14]  | Gla-100 OD + OADs             | 52.2                                                                 | -                  | 43.3                                                               | -                  | -                                                                         |                    | -                                                                         |                    | -                                                                                        |                    | 38                                                                      | -                  | -                      | -                         |                      |
|                         | Insulin NPH OD / BD + OADs    | 32.7                                                                 |                    | 27.1                                                               |                    | -                                                                         |                    | -                                                                         |                    | 21.4                                                                                     |                    | -                                                                       |                    | -                      |                           |                      |
| Home PD, 2014 [15]      | Gla-100 + OADs                | 50.34                                                                | -                  | -                                                                  |                    | -                                                                         |                    | -                                                                         |                    | -                                                                                        |                    | -                                                                       |                    | 25.5 (7.4)             | 31.8 (4.7)                | -                    |
|                         | Insulin NPH + OADs            | 4.3                                                                  |                    | -                                                                  |                    | -                                                                         |                    | -                                                                         |                    | 24.6 (7.6)                                                                               |                    | 31 (5.7)                                                                |                    |                        |                           |                      |
| Hsia SH, 2011 [17]      | Insulin NPH + OADs            | 23.3                                                                 | -                  | -                                                                  |                    | -                                                                         |                    | -                                                                         |                    | -                                                                                        |                    | -                                                                       |                    | -                      | -                         |                      |
|                         | Gla-100 HS + OADs             | 28                                                                   |                    | -                                                                  |                    | -                                                                         |                    | -                                                                         |                    | -                                                                                        |                    |                                                                         |                    |                        |                           |                      |
|                         | Gla-100 morning + OADs        | 23.3                                                                 |                    | -                                                                  |                    | -                                                                         |                    | -                                                                         |                    | -                                                                                        |                    |                                                                         |                    |                        |                           |                      |
| Pan, 2007 [20]          | Gla-100 + glimepiride 3mg     | 38.1                                                                 | -                  | 62.3                                                               | -                  | -                                                                         |                    | 22.9                                                                      | 0.0174             | -                                                                                        |                    | -                                                                       |                    | -                      | -                         |                      |
|                         | Insulin NPH + glimepiride 3mg | 30.3                                                                 |                    | 58.7                                                               |                    | -                                                                         |                    | 14                                                                        |                    | -                                                                                        |                    |                                                                         |                    |                        |                           |                      |
| Eliaschewitz, 2006 [22] | Gla-100 + glimepiride 4mg     | 115 (50.4)                                                           | -                  | 96 (42.1)                                                          | -                  | 26.8                                                                      | 0.014              | -                                                                         |                    | -                                                                                        |                    | -                                                                       |                    | 12.6 (5.9)             | 16.6 (2.6)                | <0.02                |

| Author (year)                         | Intervention                                                | Proportion of patients achieving target HbA1c [n (if available)] (%) | Intergroup p-value | Proportion of patients achieving target FPG [n (if available)] (%) | Intergroup p-value | Proportion of patients achieving HbA1c with no confirmed hypoglycemia (%) | Intergroup p-value | Proportion of patients achieving HbA1c with no nocturnal hypoglycemia (%) | Intergroup p-value | Proportion of patients achieving FPG target with no confirmed nocturnal hypoglycemia (%) | Intergroup p-value | Proportion of patients achieving FPG with no nocturnal hypoglycemia (%) | Intergroup p-value | Treatment Satisfaction |                           |                      |
|---------------------------------------|-------------------------------------------------------------|----------------------------------------------------------------------|--------------------|--------------------------------------------------------------------|--------------------|---------------------------------------------------------------------------|--------------------|---------------------------------------------------------------------------|--------------------|------------------------------------------------------------------------------------------|--------------------|-------------------------------------------------------------------------|--------------------|------------------------|---------------------------|----------------------|
|                                       |                                                             |                                                                      |                    |                                                                    |                    |                                                                           |                    |                                                                           |                    |                                                                                          |                    |                                                                         |                    | Baseline score (SD)    | Post-treatment score (SD) | p-value (intergroup) |
|                                       | Insulin NPH + glimepiride 4mg                               | 118 (48)                                                             |                    | 98 (39.8)                                                          |                    | 17.3                                                                      |                    | -                                                                         |                    | -                                                                                        |                    | -                                                                       |                    | 12.5 (6.3)             | 16 (3.3)                  |                      |
| Benedetti, 2003 [24]                  | Gla-100 OD + OADs                                           | 42                                                                   | -                  | -                                                                  | -                  | -                                                                         | -                  | -                                                                         | -                  | -                                                                                        | -                  | -                                                                       | -                  | -                      | -                         |                      |
|                                       | Insulin NPH OD / BD + OADs                                  | 44                                                                   |                    | -                                                                  |                    | -                                                                         |                    | -                                                                         |                    | -                                                                                        |                    | -                                                                       |                    | -                      | -                         | -                    |
| Riddle, 2003 [25]                     | Gla-100 + OADs                                              | 213 (58)                                                             | -                  | 133 (36.2)                                                         | -                  | -                                                                         | -                  | 33.2                                                                      | 0.05               | -                                                                                        | -                  | 22.1                                                                    | <0.03              | -                      | -                         |                      |
|                                       | Insulin NPH + OADs                                          | 223 (57.3)                                                           |                    | 134 (34.4)                                                         |                    | -                                                                         |                    | 26.7                                                                      |                    | -                                                                                        |                    | 15.9                                                                    |                    | -                      | -                         | -                    |
| Yki-Jarvinen, 2000 [26]               | Gla-100 + OADs                                              | -                                                                    | -                  | 83 (38.7)                                                          | -                  | -                                                                         | -                  | -                                                                         | -                  | -                                                                                        | -                  | -                                                                       | -                  | -                      | -                         |                      |
|                                       | Insulin NPH + OADs                                          | -                                                                    |                    | 66 (31.7)                                                          |                    | -                                                                         |                    | -                                                                         |                    | -                                                                                        |                    | -                                                                       |                    | -                      | -                         | -                    |
| <b>Glargine vs. Premixed Insulins</b> |                                                             |                                                                      |                    |                                                                    |                    |                                                                           |                    |                                                                           |                    |                                                                                          |                    |                                                                         |                    |                        |                           |                      |
| Petrovski, 2018 [27]                  | Human / Analog premixed alone switched to Gla-100 OD ± OADs | 30.2                                                                 | -                  | 52.3                                                               | -                  | -                                                                         |                    | -                                                                         |                    | -                                                                                        |                    | -                                                                       |                    | -                      | -                         |                      |
| Cao Y, 2017 [29]                      | Gla-100 OD + Sitagliptin 100mg                              | 56.25                                                                | -                  | -                                                                  | -                  | -                                                                         |                    | -                                                                         |                    | -                                                                                        |                    | -                                                                       |                    | -                      | 89.1 (12.38)              | <0.05                |
|                                       | Insulin Aspart 30 BD                                        | 37.5                                                                 |                    | -                                                                  | -                  | -                                                                         |                    | -                                                                         |                    | -                                                                                        |                    | -                                                                       |                    | -                      | 76.26 (14.78)             |                      |



| Author (year)      | Intervention                                | Proportion of patients achieving target HbA1c [n (if available)] (%) | Intergroup p-value | Proportion of patients achieving target FPG [n (if available)] (%) | Intergroup p-value | Proportion of patients achieving HbA1c with no confirmed hypoglycemia (%) | Intergroup p-value | Proportion of patients achieving HbA1c with no nocturnal hypoglycemia (%) | Intergroup p-value | Proportion of patients achieving FPG target with no confirmed nocturnal hypoglycemia (%) | Intergroup p-value | Proportion of patients achieving FPG with no nocturnal hypoglycemia (%) | Intergroup p-value | Treatment Satisfaction |                           |                      |   |
|--------------------|---------------------------------------------|----------------------------------------------------------------------|--------------------|--------------------------------------------------------------------|--------------------|---------------------------------------------------------------------------|--------------------|---------------------------------------------------------------------------|--------------------|------------------------------------------------------------------------------------------|--------------------|-------------------------------------------------------------------------|--------------------|------------------------|---------------------------|----------------------|---|
|                    |                                             |                                                                      |                    |                                                                    |                    |                                                                           |                    |                                                                           |                    |                                                                                          |                    |                                                                         |                    | Baseline score (SD)    | Post-treatment score (SD) | p-value (intergroup) |   |
| Buse, 2009 [33]    | Lispro mix 75/25 + OADs                     | 47.5                                                                 | <0.001             | -                                                                  |                    | -                                                                         |                    | -                                                                         |                    | -                                                                                        |                    | -                                                                       |                    | -                      | -                         | -                    |   |
|                    | Gla-100 + OADs                              | 40.3                                                                 |                    | -                                                                  |                    | -                                                                         |                    | -                                                                         |                    | -                                                                                        |                    | -                                                                       |                    | -                      |                           |                      |   |
| Strojek, 2009 [32] | BI-Asp 30 + MET + SU (Glimepiride)          | 44.9                                                                 | -                  | 20                                                                 | -                  | 36.4                                                                      |                    | -                                                                         |                    | -                                                                                        |                    | -                                                                       |                    | -                      | -                         | -                    | - |
|                    | Gla-100 + MET + SU (Glimepiride)            | 45.7                                                                 |                    | 19.4                                                               |                    | 39.7                                                                      |                    | -                                                                         |                    | -                                                                                        |                    | -                                                                       |                    | -                      |                           |                      |   |
| Raskin, 2007 [36]  | BiAsp 70/30 BD + MET                        | 65                                                                   | 0.003              | -                                                                  |                    | -                                                                         |                    | -                                                                         |                    | -                                                                                        |                    | -                                                                       |                    | -                      | -                         | -                    |   |
|                    | Gla-100 OD + MET                            | 41                                                                   |                    | -                                                                  |                    | -                                                                         |                    | -                                                                         |                    | -                                                                                        |                    | -                                                                       |                    |                        |                           |                      |   |
| Robbins, 2007 [35] | Lispro Mix 75/25 BD + MET BD                | 39.7                                                                 | <0.005             | -                                                                  |                    | -                                                                         |                    | -                                                                         |                    | -                                                                                        |                    | -                                                                       |                    | -                      | -                         | -                    |   |
|                    | Gla-100 OD + MET BD                         | 56.3                                                                 |                    | -                                                                  |                    | -                                                                         |                    | -                                                                         |                    | -                                                                                        |                    | -                                                                       |                    |                        |                           |                      |   |
| Schiel, 2007 [34]  | Grp A: Gla-100 OD + Glimepiride OD          |                                                                      |                    |                                                                    |                    |                                                                           |                    |                                                                           |                    |                                                                                          |                    |                                                                         |                    | -                      | 31.6 (7.6)                |                      | - |
|                    | Grp B: Gla-100 OD + Glimepiride OD + MET BD |                                                                      |                    |                                                                    |                    |                                                                           |                    |                                                                           |                    |                                                                                          |                    |                                                                         |                    | -                      | 32.6 (5)                  |                      |   |





| Author (year)     | Intervention                                                                      | Proportion of patients achieving target HbA1c [n (if available)] (%) | Intergroup p-value | Proportion of patients achieving target FPG [n (if available)] (%) | Intergroup p-value | Proportion of patients achieving HbA1c with no confirmed hypoglycemia (%) | Intergroup p-value | Proportion of patients achieving HbA1c with no nocturnal hypoglycemia (%) | Intergroup p-value | Proportion of patients achieving FPG target with no confirmed nocturnal hypoglycemia (%) | Intergroup p-value | Proportion of patients achieving FPG with no nocturnal hypoglycemia (%) | Intergroup p-value | Treatment Satisfaction |                           |                      |
|-------------------|-----------------------------------------------------------------------------------|----------------------------------------------------------------------|--------------------|--------------------------------------------------------------------|--------------------|---------------------------------------------------------------------------|--------------------|---------------------------------------------------------------------------|--------------------|------------------------------------------------------------------------------------------|--------------------|-------------------------------------------------------------------------|--------------------|------------------------|---------------------------|----------------------|
|                   |                                                                                   |                                                                      |                    |                                                                    |                    |                                                                           |                    |                                                                           |                    |                                                                                          |                    |                                                                         |                    | Baseline score (SD)    | Post-treatment score (SD) | p-value (intergroup) |
|                   | Lispro Mid-mixture (50% lispro / 50% NPL)                                         | 59.3                                                                 |                    | -                                                                  |                    | -                                                                         |                    | -                                                                         |                    | -                                                                                        |                    | -                                                                       |                    | -                      | -                         |                      |
|                   | Gla-100 OD                                                                        | 24.5                                                                 |                    | -                                                                  |                    | -                                                                         |                    | -                                                                         |                    | -                                                                                        |                    | -                                                                       |                    | -                      | -                         |                      |
| Janka, 2005 [39]  | Gla-100 + OADs (glimpeiride + metformin)                                          | 49.4                                                                 | -                  | 31.6                                                               | 0.0002             | -                                                                         |                    | 45.5                                                                      | 0.0013             | -                                                                                        |                    | -                                                                       |                    | -                      | -                         |                      |
|                   | Human premixed insulin (30% regular, 70%NPH insulin; Insulin Actraphane HM 30/70) | 39                                                                   |                    | 15                                                                 |                    | -                                                                         |                    | 28.6                                                                      |                    | -                                                                                        |                    | -                                                                       |                    | -                      | -                         |                      |
| Raskin, 2005 [40] | BiAsp 70/30 BD + OADs                                                             | -                                                                    |                    | -                                                                  |                    | -                                                                         |                    | -                                                                         |                    | -                                                                                        |                    | -                                                                       |                    | -                      | -                         |                      |
|                   | Gla-100 OD + OADs                                                                 | -                                                                    |                    | -                                                                  |                    | -                                                                         |                    | -                                                                         |                    | -                                                                                        |                    | -                                                                       |                    | -                      | -                         |                      |
| Malone, 2004 [41] | Sequence B (Lispro Mix 75/25 + MET 1500-2550 mg/day followed by Gla-100 HS +      | 42                                                                   | <0.001             | 45                                                                 | 0.019              | -                                                                         |                    | -                                                                         |                    | -                                                                                        |                    | -                                                                       |                    | -                      | -                         |                      |

| Author (year)                                       | Intervention                                                                                       | Proportion of patients achieving target HbA1c [n (if available)] (%) | Intergroup p-value | Proportion of patients achieving target FPG [n (if available)] (%) | Intergroup p-value | Proportion of patients achieving HbA1c with no confirmed hypoglycemia (%) | Intergroup p-value | Proportion of patients achieving HbA1c with no nocturnal hypoglycemia (%) | Intergroup p-value | Proportion of patients achieving FPG target with no confirmed nocturnal hypoglycemia (%) | Intergroup p-value | Proportion of patients achieving FPG with no nocturnal hypoglycemia (%) | Intergroup p-value | Treatment Satisfaction |                           |                      |
|-----------------------------------------------------|----------------------------------------------------------------------------------------------------|----------------------------------------------------------------------|--------------------|--------------------------------------------------------------------|--------------------|---------------------------------------------------------------------------|--------------------|---------------------------------------------------------------------------|--------------------|------------------------------------------------------------------------------------------|--------------------|-------------------------------------------------------------------------|--------------------|------------------------|---------------------------|----------------------|
|                                                     |                                                                                                    |                                                                      |                    |                                                                    |                    |                                                                           |                    |                                                                           |                    |                                                                                          |                    |                                                                         |                    | Baseline score (SD)    | Post-treatment score (SD) | p-value (intergroup) |
|                                                     | MET 1500-2550 mg/day)                                                                              |                                                                      |                    |                                                                    |                    |                                                                           |                    |                                                                           |                    |                                                                                          |                    |                                                                         |                    |                        |                           |                      |
|                                                     | Sequence A (Gla-100 HS + MET 1500-2550 mg/day followed by Lispro Mix 75/25 + MET 1500-2550 mg/day) | 18                                                                   |                    | 65                                                                 |                    | -                                                                         |                    | -                                                                         |                    | -                                                                                        |                    | -                                                                       |                    | -                      |                           | -                    |
| <b>Glargine vs. Second Generation Basal Insulin</b> |                                                                                                    |                                                                      |                    |                                                                    |                    |                                                                           |                    |                                                                           |                    |                                                                                          |                    |                                                                         |                    |                        |                           |                      |
| Bailey, 2019 [42]                                   | Gla-300 OD + OADs                                                                                  | 25                                                                   | 0.029              | -                                                                  |                    | -                                                                         |                    | -                                                                         |                    | -                                                                                        |                    | -                                                                       |                    | -                      |                           | -                    |
|                                                     | Gla-100 OD + OADs                                                                                  | 21.5                                                                 |                    | -                                                                  |                    | -                                                                         |                    | -                                                                         |                    | -                                                                                        |                    | -                                                                       |                    | -                      |                           | -                    |
| Ghosal, 2016 [47]                                   | IDeg 100 OD + OADs                                                                                 | 69                                                                   | -                  | -                                                                  |                    | -                                                                         |                    | -                                                                         |                    | -                                                                                        |                    | -                                                                       |                    | -                      |                           | -                    |
|                                                     | Gla-100 OD + OADs                                                                                  | 415                                                                  |                    | -                                                                  |                    | -                                                                         |                    | -                                                                         |                    | -                                                                                        |                    | -                                                                       |                    | -                      |                           | -                    |
| Terauchi, 2016 [8]                                  | Gla-300 OD ± OADs                                                                                  | 25                                                                   | -                  | 33.9                                                               | -                  | 23.3                                                                      | -                  | -                                                                         |                    | 28.8                                                                                     | -                  | -                                                                       |                    | -                      | -                         | -                    |
|                                                     | Gla-100 OD ± OADs                                                                                  | 24.2                                                                 |                    | 40.3                                                               |                    | 22.5                                                                      |                    | -                                                                         |                    | 34.5                                                                                     |                    | -                                                                       |                    | -                      | -                         | -                    |



| Author (year)                               | Intervention                                                              | Proportion of patients achieving target HbA1c [n (if available)] (%) | Intergroup p-value | Proportion of patients achieving target FPG [n (if available)] (%) | Intergroup p-value | Proportion of patients achieving HbA1c with no confirmed hypoglycemia (%) | Intergroup p-value | Proportion of patients achieving HbA1c with no nocturnal hypoglycemia (%) | Intergroup p-value | Proportion of patients achieving FPG target with no confirmed nocturnal hypoglycemia (%) | Intergroup p-value | Proportion of patients achieving FPG with no nocturnal hypoglycemia (%) | Intergroup p-value | Treatment Satisfaction |                           |                      |
|---------------------------------------------|---------------------------------------------------------------------------|----------------------------------------------------------------------|--------------------|--------------------------------------------------------------------|--------------------|---------------------------------------------------------------------------|--------------------|---------------------------------------------------------------------------|--------------------|------------------------------------------------------------------------------------------|--------------------|-------------------------------------------------------------------------|--------------------|------------------------|---------------------------|----------------------|
|                                             |                                                                           |                                                                      |                    |                                                                    |                    |                                                                           |                    |                                                                           |                    |                                                                                          |                    |                                                                         |                    | Baseline score (SD)    | Post-treatment score (SD) | p-value (intergroup) |
|                                             | Gla-100 OD + OADs minus DPP-4 inhibitors                                  | 48.6                                                                 |                    | -                                                                  |                    | -                                                                         |                    | -                                                                         |                    | -                                                                                        |                    | -                                                                       |                    | -                      | -                         |                      |
| Zinman B, 2012 [53]                         | IDeg -100 + MET ± DPP-4 inhibitors                                        | 52                                                                   | -                  | -                                                                  |                    | 42                                                                        | -                  | -                                                                         |                    | 53                                                                                       | -                  | -                                                                       |                    | -                      | -                         | -                    |
|                                             | Gla-100 OD + MET ± DPP-4 inhibitors                                       | 54                                                                   |                    | -                                                                  |                    | 46                                                                        |                    | -                                                                         |                    | 54                                                                                       |                    | -                                                                       |                    | -                      | -                         |                      |
| Pan, 2007 [20]                              | Gla-100 + glimepiride 3mg                                                 | 51.4                                                                 | -                  | -                                                                  |                    | -                                                                         |                    | -                                                                         |                    | -                                                                                        |                    | -                                                                       |                    | -                      | -                         | -                    |
|                                             | Insulin NPH + glimepiride 3mg                                             | 54.2                                                                 |                    | -                                                                  |                    | -                                                                         |                    | -                                                                         |                    | -                                                                                        |                    | -                                                                       |                    | -                      | -                         |                      |
| <b>Glargine vs. Co-formulations Insulin</b> |                                                                           |                                                                      |                    |                                                                    |                    |                                                                           |                    |                                                                           |                    |                                                                                          |                    |                                                                         |                    |                        |                           |                      |
| Kumar, 2017 [54]                            | IDegAsp OD + metformin ± pioglitazone ± dipeptidyl peptidase-4 inhibitors | 36.5                                                                 | -                  | -                                                                  |                    | 20.9                                                                      |                    | -                                                                         |                    | -                                                                                        |                    | -                                                                       |                    | -                      | -                         |                      |
|                                             | Gla-100 OD + metformin ± pioglitazone ±                                   | 40                                                                   |                    | -                                                                  |                    | 23.5                                                                      |                    | -                                                                         |                    | -                                                                                        |                    | -                                                                       |                    | -                      | -                         |                      |



| Author (year)          | Intervention                                              | Proportion of patients achieving target HbA1c [n (if available)] (%) | Intergroup p-value | Proportion of patients achieving target FPG [n (if available)] (%) | Intergroup p-value | Proportion of patients achieving HbA1c with no confirmed hypoglycemia (%) | Intergroup p-value | Proportion of patients achieving HbA1c with no nocturnal hypoglycemia (%) | Intergroup p-value | Proportion of patients achieving FPG target with no confirmed nocturnal hypoglycemia (%) | Intergroup p-value | Proportion of patients achieving FPG with no nocturnal hypoglycemia (%) | Intergroup p-value | Treatment Satisfaction |                           |                      |
|------------------------|-----------------------------------------------------------|----------------------------------------------------------------------|--------------------|--------------------------------------------------------------------|--------------------|---------------------------------------------------------------------------|--------------------|---------------------------------------------------------------------------|--------------------|------------------------------------------------------------------------------------------|--------------------|-------------------------------------------------------------------------|--------------------|------------------------|---------------------------|----------------------|
|                        |                                                           |                                                                      |                    |                                                                    |                    |                                                                           |                    |                                                                           |                    |                                                                                          |                    |                                                                         |                    | Baseline score (SD)    | Post-treatment score (SD) | p-value (intergroup) |
|                        | Cohort 2 - Gla-S Impact (Gla-100 OD switched)             | 19.1                                                                 |                    | -                                                                  |                    | -                                                                         |                    | -                                                                         |                    | -                                                                                        |                    | -                                                                       |                    | -                      | -                         |                      |
| Meneghini L, 2013 [60] | Det OD + MET                                              | 38                                                                   | 0.026              | -                                                                  |                    | 32                                                                        | -                  | -                                                                         |                    | -                                                                                        |                    | -                                                                       |                    | -                      | -                         | -                    |
|                        | Gla-100 OD + MET                                          | 53                                                                   |                    | -                                                                  |                    | 38                                                                        |                    | -                                                                         |                    | -                                                                                        |                    | -                                                                       |                    | -                      | -                         |                      |
| Esposito, 2008 [61]    | Human NPL OD +OADs minus night-time SU, replaced with MET | 62                                                                   | -                  | 40                                                                 | -                  | -                                                                         |                    | -                                                                         |                    | -                                                                                        |                    | -                                                                       |                    | -                      | -                         |                      |
|                        | Gla-100 OD +OADs minus night-time SU, replaced with MET   | 64                                                                   |                    | 41                                                                 |                    | -                                                                         |                    | -                                                                         |                    | -                                                                                        |                    | -                                                                       |                    | -                      | -                         |                      |
| Rosenstock, 2008 [9]   | IDet OD + OADs                                            | 52                                                                   | -                  | 46                                                                 | <0.01              | -                                                                         |                    | -                                                                         |                    | -                                                                                        |                    | -                                                                       |                    | -                      | -                         |                      |
|                        | Gla-100 OD + OADs                                         | 52                                                                   |                    | 58                                                                 |                    | -                                                                         |                    | -                                                                         |                    | -                                                                                        |                    | -                                                                       |                    | -                      | -                         |                      |
| Malone, 2005 [62]      | Seq B - Lispro mix 75/25 BD + MET followed by Gla-100 OD  | 30                                                                   | 0.002              | 34                                                                 | 0.01               | -                                                                         |                    | -                                                                         |                    | -                                                                                        |                    | -                                                                       |                    | -                      | -                         |                      |

| Author (year) | Intervention                                             | Proportion of patients achieving target HbA1c [n (if available)] (%) | Intergroup p-value | Proportion of patients achieving target FPG [n (if available)] (%) | Intergroup p-value | Proportion of patients achieving HbA1c with no confirmed hypoglycemia (%) | Intergroup p-value | Proportion of patients achieving HbA1c with no nocturnal hypoglycemia (%) | Intergroup p-value | Proportion of patients achieving FPG target with no confirmed nocturnal hypoglycemia (%) | Intergroup p-value | Proportion of patients achieving FPG with no nocturnal hypoglycemia (%) | Intergroup p-value | Treatment Satisfaction |                           |                      |
|---------------|----------------------------------------------------------|----------------------------------------------------------------------|--------------------|--------------------------------------------------------------------|--------------------|---------------------------------------------------------------------------|--------------------|---------------------------------------------------------------------------|--------------------|------------------------------------------------------------------------------------------|--------------------|-------------------------------------------------------------------------|--------------------|------------------------|---------------------------|----------------------|
|               |                                                          |                                                                      |                    |                                                                    |                    |                                                                           |                    |                                                                           |                    |                                                                                          |                    |                                                                         |                    | Baseline score (SD)    | Post-treatment score (SD) | p-value (intergroup) |
|               | Seq A - Gla-100 OD + MET followed by Lispro mix 75/25 BD | 12                                                                   |                    | 51                                                                 |                    | -                                                                         |                    | -                                                                         |                    | -                                                                                        |                    | -                                                                       |                    | -                      | -                         |                      |

BD, bi- daily; DPP-4, dipeptidyl peptidase-4; IDeg, insulin degludec; Gla-100, glargine-100; Gla-300, glargine-300; MET, metformin; NPH, neutral protamine hagedorn; OADs, oral anti-diabetics, OD, once daily; RCT, randomized clinical trial; SU, sulfonylurea; TID, thrice a day.

**Table S3. Response Rates (Intensification)**

| Author (year)                         | Intervention                                          | Proportion of patients achieving target HbA1c [ n (if available) (%)] | Intergroup p-value | Proportion of patients achieving target FPG [ n (if available) (%)] | Intergroup p-value | Proportion of patients achieving HbA1c with no confirmed hypoglycaemia (%) | Intergroup p-value | Proportion of patients achieving HbA1c with no nocturnal hypoglycaemia (%) | Intergroup p-value | Proportion of patients achieving FPG target with no confirmed nocturnal hypoglycaemia (%) | Intergroup p-value | Proportion of patients achieving FPG with no nocturnal hypoglycaemia (%) | Intergroup p-value | Treatment Satisfaction |                           |                      |
|---------------------------------------|-------------------------------------------------------|-----------------------------------------------------------------------|--------------------|---------------------------------------------------------------------|--------------------|----------------------------------------------------------------------------|--------------------|----------------------------------------------------------------------------|--------------------|-------------------------------------------------------------------------------------------|--------------------|--------------------------------------------------------------------------|--------------------|------------------------|---------------------------|----------------------|
|                                       |                                                       |                                                                       |                    |                                                                     |                    |                                                                            |                    |                                                                            |                    |                                                                                           |                    |                                                                          |                    | Baseline score (SD)    | Post-treatment score (SD) | p-value (intergroup) |
| <b>Glargine vs. NPH</b>               |                                                       |                                                                       |                    |                                                                     |                    |                                                                            |                    |                                                                            |                    |                                                                                           |                    |                                                                          |                    |                        |                           |                      |
| Rosenstock, 2001 [73]                 | Gla-100 OD ± premeal regular insulin                  | -                                                                     | -                  | 23.6                                                                | -                  | -                                                                          | -                  | -                                                                          | -                  | -                                                                                         | -                  | -                                                                        | -                  | -                      | -                         | -                    |
|                                       | NPH insulin OD / BD ± premeal regular insulin         | -                                                                     | -                  | 27.1                                                                | -                  | -                                                                          | -                  | -                                                                          | -                  | -                                                                                         | -                  | -                                                                        | -                  | -                      | -                         | -                    |
| <b>Glargine vs. Premixed Insulins</b> |                                                       |                                                                       |                    |                                                                     |                    |                                                                            |                    |                                                                            |                    |                                                                                           |                    |                                                                          |                    |                        |                           |                      |
| Aschner, 2015 [74]                    | Gla-100 OD + glulisine OD before main meal + MET ± SU | 43.2                                                                  | <0.005             | -                                                                   | -                  | 33.2                                                                       | -                  | -                                                                          | -                  | -                                                                                         | -                  | -                                                                        | -                  | -                      | -                         | -                    |
|                                       | Premixed insulin BD MET ± SU                          | 52.6                                                                  | -                  | -                                                                   | -                  | 31.4                                                                       | -                  | -                                                                          | -                  | -                                                                                         | -                  | -                                                                        | -                  | -                      | -                         | -                    |
| Ito H, 2014 [71]                      | Human premixed insulin 50/50 switched to              | -                                                                     | -                  | -                                                                   | -                  | -                                                                          | -                  | -                                                                          | -                  | -                                                                                         | -                  | -                                                                        | -                  | 23.7 (7.1)             | 24.5 (6.4)                | -                    |

















| Author (year) | Intervention                                              | Proportion of patients achieving target HbA1c [n (if available)] (%) | Intergroup p-value | Proportion of patients achieving target FPG [n (if available)] (%) | Intergroup p-value | Proportion of patients achieving HbA1c with no confirmed hypoglycaemia (%) | Intergroup p-value | Proportion of patients achieving HbA1c with no nocturnal hypoglycaemia (%) | Intergroup p-value | Proportion of patients achieving FPG target with no confirmed nocturnal hypoglycaemia (%) | Intergroup p-value | Proportion of patients achieving FPG with no nocturnal hypoglycaemia (%) | Intergroup p-value | Treatment Satisfaction |                           |                      |
|---------------|-----------------------------------------------------------|----------------------------------------------------------------------|--------------------|--------------------------------------------------------------------|--------------------|----------------------------------------------------------------------------|--------------------|----------------------------------------------------------------------------|--------------------|-------------------------------------------------------------------------------------------|--------------------|--------------------------------------------------------------------------|--------------------|------------------------|---------------------------|----------------------|
|               |                                                           |                                                                      |                    |                                                                    |                    |                                                                            |                    |                                                                            |                    |                                                                                           |                    |                                                                          |                    | Baseline score (SD)    | Post-treatment score (SD) | p-value (intergroup) |
|               | Premixed BD switched to Gla-100 OD + rapid acting insulin | 29.6                                                                 |                    | -                                                                  |                    | -                                                                          |                    | -                                                                          |                    | -                                                                                         |                    | -                                                                        |                    | -                      | -                         |                      |

BD, bi- daily; DPP-4, dipeptidyl peptidase-4; IDeg, insulin degludec; Gla-100, glargine-100; Gla-300, glargine-300; MET, metformin; NPH, neutral protamine hagedorn; OADs, oral anti-diabetics, OD, once daily; RCT, randomized clinical trial; SU, sulfonylurea; TID, thrice a day.

**Table S4.** Glycemic Variability (Initiation)

| Author (year)           | Glycaemic variability                                                                                                                                                                                                                                     |
|-------------------------|-----------------------------------------------------------------------------------------------------------------------------------------------------------------------------------------------------------------------------------------------------------|
| <b>Gla-100 vs. NPH</b>  |                                                                                                                                                                                                                                                           |
| Riddle, 2003 [25]       | a. Mean deviation from the median of fasting values for individual subjects was greater with NPH than glargine (20.36 mg/dl vs. 18.38 mg/dl; between-treatment P = 0.013, after adjustment for baseline).                                                 |
| Yki-Jarvinen, 2006 [21] | a. The CVs of diurnal plasma glucose (means of all diurnal profiles) were 24.0± 0.8 and 22.2±0.9% (p=0.16, NS) during the run-in period, and 29.7±0.5 and 30.4±0.5% (p=0.30, NS) during the study proper for the G+MET and NPH+ MET groups, respectively. |
|                         | b. The CVs of FPG levels during the run-in period and the study were also similar.                                                                                                                                                                        |
| Pan, 2007 [20]          | a. The decrease in mean daily BG was significantly greater in the insulin glargine versus the NPH-treated group (mean change 94 mg/dL vs. 80 mg/dL, p = 0.018).                                                                                           |



| Author (year)                        | Glycaemic variability                                                                                                                                                                                                                                                                                                                                  |
|--------------------------------------|--------------------------------------------------------------------------------------------------------------------------------------------------------------------------------------------------------------------------------------------------------------------------------------------------------------------------------------------------------|
| Mattia, 2009 [19]                    | a. The mean amplitude of glucose excursions (MAGE) index measured in the SMBG tended to improve between baseline and endpoint with both insulin glargine (-17.0 mg/dl; 95% CI: -34.5, 0.6 mg/dl; p = 0.058) and with NPH insulin (-13.1 mg/dl; 95% CI: -31.4, 5.3 mg/dl; p = 0.152), but there was no difference between the two insulins (p = 0.603). |
|                                      | b. Mean daily BG (MDBG) measured in the SMBG improved significantly between baseline and endpoint with both insulin glargine (-40.9 mg/dL; 95% CI: -57.0, -24.8 mg/dl; p < 0.0001) and with NPH insulin (-43.9 mg/dl; 95% CI: -59.9, -27.8 mg/dl; p < 0.0001): there were no differences between the two insulins (p = 0.701).                         |
|                                      | c. The CGMS-determined post-meal test BG profile revealed a lower BG excursion with insulin glargine than with NPH insulin (129.1 vs. 152.8; p<0.05 at 5-h post-meal test and 108.5 vs. 154.6; p < 0.01 at 6-h post-meal test                                                                                                                          |
|                                      | d. Meal test blood glucose values showed better post-prandial glucose control with Gla-100 vs. NPH - 146.5 (16.7) vs. 171.2 (24.7); p < 0.02                                                                                                                                                                                                           |
| Home PD, 2014 [15]                   | Mean change from baseline in daily average plasma glucose was greater with glargine than with NPH insulin (-2.5 vs. -2.2 mmol/l), with a small estimated treatment difference of -0.3 (-0.5, -0.1) mmol/l (p=0.006).                                                                                                                                   |
| Mu P, 2011 [18]                      | CV of FBG was significantly lower with Gla-100 [13.4 (3.6) at baseline to 10.2 (4.2)] vs. NPH [12.9 (4) at baseline to 19.6 (6.1)]; p < 0.05                                                                                                                                                                                                           |
| Benedetti, 2003 [24]                 | Mean 24-hr blood glucose value reduced similarly from baseline to end of 52 weeks of treatment for Gla-100 [37.8 (1.8)] vs. NPH [34.2 (1.8)]; p = NS                                                                                                                                                                                                   |
| <b>Gla-100 vs. Premixed Insulins</b> |                                                                                                                                                                                                                                                                                                                                                        |
| Roach, 2006 [13]                     | a. Mean 24-h PG and mean 24-h PG AUC were significantly smaller for insulin lispro 25/75 plus oral agents (<0.010; 0.015).                                                                                                                                                                                                                             |
|                                      | b. The M-value was lower for insulin lispro 25/75 plus oral agents during the in-patient test meal period (9.3 ± 6.6 vs. 14.4 ± 10.8, (P=0.020).                                                                                                                                                                                                       |
| Robbins, 2007 [35]                   | a. Mean daily BG was also significantly lower with LMS0/50 + Met (8.2 [1.3] vs. 8.7 [1.9] mmol/L [147 (23) vs. 156 (35) mg/dL]; (P=0.002).                                                                                                                                                                                                             |
|                                      | b. The M-values were comparable between the LM50/50 + Met and G + Met groups at baseline (mean [SD], 30.6 [20.8] vs. 31.9 [24.6]; P = NS), but the M-value was significantly lower with LM50/50 + Met at end point (17.3 [13.8] vs. 25.1 [24.8]; P < 0.001).                                                                                           |
| Janka, 2005 [39]                     | Mean daily blood glucose level improved from 182 to 137 mg/dl in the glargine plus OAD group compared with 184 to 151 mg/dl in the 70/30 group (P < 0.0001 for between-treatment difference).                                                                                                                                                          |
| Sakharova O V 2013 [30]              | The mean SMBG values were similar between groups (glargine, 150±29 vs. lispro mix, 145±31 mg/dL, p=0.572).                                                                                                                                                                                                                                             |
| Cao Y, 2017 [29]                     | Significantly lower MPG, SD and MAGE was observed with Gla-100 + Sita vs. NOV (p<0.01)                                                                                                                                                                                                                                                                 |

| <b>Author (year)</b>                                | <b>Glycaemic variability</b>                                                                                                                                                                                                                                                                 |
|-----------------------------------------------------|----------------------------------------------------------------------------------------------------------------------------------------------------------------------------------------------------------------------------------------------------------------------------------------------|
| Raskin, 2005 [40]                                   | Overall postprandial glycemic exposure was ~25% less for the BIAsp 70/30 group than for the glargine group, as demonstrated by a lower cumulative SMPG value (sum of the three mealtime plasma glucose increments) for the BIAsp 70/30 group (97.4 [90.4] vs. 129.6 [102]) mg/dL, P < 0.05). |
| <b>Gla-100 vs. Second Generation Basal Insulins</b> |                                                                                                                                                                                                                                                                                              |
| Pan, 2016 [46]                                      | The within subject variability in pre-breakfast SMPG as measured by CV% was 14.2 % with IDeg and 12.9 % with IGLar (estimated treatment ratio [95 % CI] IDeg/IGlar of 1.10 [1.02 to 1.18])                                                                                                   |
| Onishi Y 2013 [51]                                  | a. The estimated within-subject day-to-day variation (CV%) in prebreakfast SMPG levels (measured during week 26 of treatment) was significantly lower for IDeg than IGLar (16.3 vs. 18.2%; treatment ratio [IDeg/IGlar]: 0.89 [95% CI 0.80 to 0.99], P = 0.013).                             |
|                                                     | b. Estimated overall mean of the nine-point SMPG profile (defined as the area under the profile divided by measurement time) was 8.1 and 7.8 mmol/L for IDeg and IGLar, respectively (ETD [IDeg – IGLar]: 0.24 mmol/L [95% CI -0.11 to 0.59], P = 0.18).                                     |
| Bolli, 2015 [48]                                    | Pre-injection mean variability measured by CV% was 18.3 (0.5) with Gla-100 and 18.7 (0.5) with a LS mean difference of 0.4 (95% CI: -1 to 1.8)                                                                                                                                               |
| <b>Gla-100 vs. Co-formulations Insulin</b>          |                                                                                                                                                                                                                                                                                              |
| Kumar, 2017 [54]                                    | a. Mean prandial glucose increments, overall and at main evening meal, were significantly lower with IDegAsp once daily than with IGLar once daily: ETD (IDegAsp once daily IGLar once daily) P < 0.001.                                                                                     |
|                                                     | b. No statistically significant differences were identified in the mean prandial increments after breakfast and lunch.                                                                                                                                                                       |
| <b>Gla-100 vs. Other Basal Insulins</b>             |                                                                                                                                                                                                                                                                                              |
| Malone, 2005 [62]                                   | a. The M-value was significantly lower with the insulin lispro mixture plus metformin (23.18 ± 20.92 vs. 31.44 ± 23.93; P = 0.001) at endpoint.                                                                                                                                              |
|                                                     | b. MODD was not different between treatments (2.01 ± 1.25 vs. 1.96 ± 1.02 mmol/ l; P = 0.484).                                                                                                                                                                                               |

**Table S5.** Glycemic Variability (Intensification)

| Author (year)                                       | Glycaemic variability                                 |                                                                                                                                                                                                   |               |               |
|-----------------------------------------------------|-------------------------------------------------------|---------------------------------------------------------------------------------------------------------------------------------------------------------------------------------------------------|---------------|---------------|
| <b>Gla-100 vs. NPH</b>                              |                                                       |                                                                                                                                                                                                   |               |               |
| Betonico, 2019 [72]                                 | a.                                                    | The within-day GV was similar for both therapies; in other words, during the Gla-100 treatment mean was 49 mg/dL (range, 31-94 mg/dL), and for NPH. the mean was 51 mg/dL (range, 15-78 mg/dL).   |               |               |
|                                                     | b.                                                    | The average daily time spent in hyperglycaemia was lower with the Gla-100 treatment than with the INPH therapy (30% and 38%, respectively; p<0.05).                                               |               |               |
|                                                     | c.                                                    | No statistical difference was found on risk of asymptomatic hypoglycaemia between Gla-100 and NPH (p=0.54)                                                                                        |               |               |
| <b>Gla-100 vs. Premixed Insulins</b>                |                                                       |                                                                                                                                                                                                   |               |               |
| Aschner, 2015 [74]                                  | a.                                                    | Mean daily BG declined from 185.4 (41.4) mg/dL at baseline to 142.2 (28.8) mg/dL at the end of the study with Gla-100 ( $\pm$ glulisine) and from 189 (43.2) to 138.6 (25.2) mg/dL with premixed. |               |               |
|                                                     | b.                                                    | The LS mean difference between the groups was 3.6 mg/dL (95% CI 0.03–0.4); p=0.024), in favour of premixed.                                                                                       |               |               |
| <b>Gla-100 vs. Second Generation basal Insulins</b> |                                                       |                                                                                                                                                                                                   |               |               |
| Riddle, 2014 [66]                                   | Pre-injection, variability (coefficient of variation) |                                                                                                                                                                                                   |               |               |
|                                                     |                                                       | Gla-300                                                                                                                                                                                           | Gla-100       |               |
|                                                     | a.                                                    | Baseline (SD)                                                                                                                                                                                     | 25.55 (12.41) | 24.97 (11.82) |
|                                                     | b.                                                    | Last visit (SD)                                                                                                                                                                                   | 22.21 (11.75) | 21.60 (11.52) |
|                                                     | c.                                                    | Mean change (SD)                                                                                                                                                                                  | -3.33 (14.56) | -3.37 (14.57) |
| d.                                                  | LS mean change (SE)                                   | -1.10 (1.22)                                                                                                                                                                                      | -1.08 (1.22)  |               |



| <b>Author, Year</b>     | <b>Random sequence generation</b> | <b>Allocation concealment</b> | <b>Selective reporting</b> | <b>Other sources of bias</b> | <b>Blinding (participants and personnel)</b> | <b>Blinding (outcome assessment)</b> | <b>Incomplete outcome data</b> | <b>Study Quality</b> |
|-------------------------|-----------------------------------|-------------------------------|----------------------------|------------------------------|----------------------------------------------|--------------------------------------|--------------------------------|----------------------|
| Hsia SH, 2011 [17]      | Unclear                           | Low                           | Low                        | Low                          | Low                                          | Low                                  | Low                            | Fair                 |
| Mu P, 2011 [18]         | Unclear                           | Unclear                       | Low                        | Low                          | Unclear                                      | Unclear                              | Low                            | Poor                 |
| Kalra, 2010 [31]        | Unclear                           | Low                           | Low                        | Low                          | Low                                          | Low                                  | Unclear                        | Poor                 |
| Jain, 2010 [64]         | Unclear                           | Unclear                       | Low                        | Low                          | Low                                          | Low                                  | Low                            | Poor                 |
| Strojek, 2009 [32]      | Low                               | Low                           | Low                        | Low                          | Low                                          | Low                                  | Unclear                        | Fair                 |
| Mattia, 2009 [19]       | Unclear                           | Low                           | Low                        | Low                          | Low                                          | Low                                  | Low                            | Fair                 |
| Raskin, 2009 [84]       | Unclear                           | Low                           | Low                        | Low                          | Low                                          | Low                                  | Low                            | Fair                 |
| Buse, 2009 [33]         | Low                               | Low                           | Low                        | Low                          | Low                                          | Low                                  | Low                            | Good                 |
| Rosenstock, 2008 [76]   | Low                               | Low                           | Low                        | Low                          | Low                                          | Low                                  | Low                            | Good                 |
| Esposito, 2008 [61]     | Low                               | Low                           | Low                        | Low                          | Low                                          | Low                                  | Low                            | Good                 |
| Rosenstock, 2008 [9]    | Low                               | Low                           | Low                        | Low                          | Low                                          | Low                                  | Low                            | Good                 |
| Raskin, 2007 [36]       | Unclear                           | Low                           | Low                        | Low                          | Low                                          | Low                                  | Low                            | Fair                 |
| Schiel, 2007 [34]       | Low                               | Low                           | Low                        | Low                          | Low                                          | Low                                  | Low                            | Good                 |
| Pan, 2007 [20]          | Unclear                           | Unclear                       | Unclear                    | Unclear                      | Low                                          | Low                                  | Low                            | Poor                 |
| Robbins, 2007 [35]      | Low                               | Low                           | Low                        | Low                          | Low                                          | Low                                  | Low                            | Good                 |
| Eliaschewitz, 2006 [22] | Unclear                           | Low                           | Low                        | Low                          | Low                                          | Low                                  | Low                            | Fair                 |
| Jacober, 2006 [37]      | Unclear                           | Unclear                       | Low                        | Low                          | Low                                          | Low                                  | Low                            | Poor                 |
| Kazda, 2006 [10]        | Unclear                           | Unclear                       | Low                        | Low                          | Low                                          | Low                                  | Unclear                        | Poor                 |
| Roach, 2006 [13]        | Unclear                           | Low                           | Low                        | Low                          | Low                                          | Low                                  | Low                            | Fair                 |
| Jarvinen, 2006 [21]     | Unclear                           | Low                           | Low                        | Low                          | Low                                          | Low                                  | Low                            | Fair                 |
| Raskin, 2005 [40]       | Unclear                           | Low                           | Low                        | Low                          | Low                                          | Low                                  | Low                            | Fair                 |
| Janka, 2005 [39]        | Low                               | Low                           | Low                        | Low                          | Low                                          | Low                                  | Low                            | Good                 |
| Malone, 2005 [62]       | Unclear                           | Unclear                       | Low                        | Low                          | Low                                          | Low                                  | Low                            | Poor                 |
| Shi, 2004 [23]          | Unclear                           | Unclear                       | Unclear                    | Unclear                      | Low                                          | Low                                  | Unclear                        | Poor                 |
| Malone, 2004 [41]       | Low                               | Low                           | Low                        | Low                          | Low                                          | Low                                  | Low                            | Good                 |
| Benedetti, 2003 [24]    | Low                               | Low                           | Unclear                    | Low                          | Low                                          | Low                                  | Unclear                        | Poor                 |

| <b>Author, Year</b>     | <b>Random sequence generation</b> | <b>Allocation concealment</b> | <b>Selective reporting</b> | <b>Other sources of bias</b> | <b>Blinding (participants and personnel)</b> | <b>Blinding (outcome assessment)</b> | <b>Incomplete outcome data</b> | <b>Study Quality</b> |
|-------------------------|-----------------------------------|-------------------------------|----------------------------|------------------------------|----------------------------------------------|--------------------------------------|--------------------------------|----------------------|
| Riddle, 2003 [25]       | Unclear                           | Low                           | Low                        | Low                          | Low                                          | Low                                  | Low                            | Fair                 |
| Rosenstock, 2001 [73]   | Unclear                           | Low                           | Low                        | Low                          | Low                                          | Low                                  | Low                            | Fair                 |
| Yki-Jarvinen, 2000 [26] | Unclear                           | Unclear                       | Low                        | Low                          | Low                                          | Low                                  | Unclear                        | Poor                 |
| Fritsche A, 2010 [64]   | Unclear                           | Unclear                       | Low                        | Low                          | High                                         | High                                 | Low                            | Poor                 |
| Levin PA, 2011 [77]     | Unclear                           | Unclear                       | Low                        | Low                          | Unclear                                      | Unclear                              | Low                            | Poor                 |
| Guigliano D, 2014 [68]  | Low                               | Low                           | Low                        | Low                          | High                                         | High                                 | Low                            | Poor                 |
| Vora J, 2015 [65]       | Low                               | Low                           | Low                        | Low                          | High                                         | High                                 | Low                            | Poor                 |
| Jia W, 2015 [79]        | Low                               | Low                           | Low                        | Low                          | High                                         | High                                 | Low                            | Poor                 |
| Bowering K, 2012 [78]   | Unclear                           | Unclear                       | Low                        | Unclear                      | High                                         | High                                 | Low                            | Poor                 |
| Miser WF, 2010 [63]     | Low                               | Low                           | Unclear                    | Unclear                      | High                                         | High                                 | Unclear                        | Poor                 |
| Riddle MC, 2014 [81]    | Low                               | Low                           | Low                        | Low                          | High                                         | High                                 | Low                            | Poor                 |
| Hollander P, 2008 [85]  | Unclear                           | Unclear                       | Low                        | Low                          | High                                         | High                                 | Low                            | Poor                 |

Assessment done using Cochrane Risk of Bias Tool (CRBT).

\*Thresholds for converting the CRBT scales to AHRQ standards (good, fair, and poor) as per: Penson DF, Krishnaswami S, Jules A, et al. Evaluation and Treatment of Cryptorchidism [Internet]. Rockville (MD): Agency for Healthcare Research and Quality (US); 2012 Dec. (Comparative Effectiveness Reviews, No. 88.) Appendix E, Quality of the Literature. Available from: <https://www.ncbi.nlm.nih.gov/books/NBK115843/>

**Table S7:** Study quality and risk of bias indicators for observational studies

| Author, Year                  | Study Design         | Representative-ness of exposed cohorts | Selection of non-exposed cohorts | Ascertainment of exposure | Study controls for other insulin users | Assessment of outcome | Long enough follow-up | <10% lost to follow up | Stars | Study Quality* |
|-------------------------------|----------------------|----------------------------------------|----------------------------------|---------------------------|----------------------------------------|-----------------------|-----------------------|------------------------|-------|----------------|
| Bailey, 2019 (DELIVER 3) [42] | Retrospective cohort | *                                      | *                                | *                         | *                                      | *                     | *                     |                        | 6     | Good           |
| Nakanishi, 2018 [6]           | Retrospective cohort |                                        | *                                | *                         |                                        | *                     | *                     |                        | 4     | Fair           |
| Gupta, 2018 [43]              | Retrospective cohort |                                        | *                                | *                         |                                        | *                     | *                     |                        | 4     | Fair           |
| Petrovski, 2018 [27]          | Prospective cohort   |                                        |                                  | *                         | *                                      | *                     | *                     | *                      | 5     | Fair           |
| Zhang, 2017 [28]              | Prospective cohort   | *                                      |                                  | *                         | *                                      | *                     | *                     | *                      | 6     | Fair           |
| Ghosal, 2016 [47]             | Retrospective cohort | *                                      |                                  | *                         | *                                      | *                     | *                     | *                      | 6     | Fair           |
| Fiesselmann, 2016 [14]        | Observational        | *                                      |                                  | *                         | *                                      | *                     | *                     | *                      | 6     | Fair           |
| Sehgal S, 2015 [7]            | Retrospective cohort | *                                      | *                                | *                         | *                                      | *                     | *                     | *                      | 7     | Good           |
| Ito H, 2014 [66]              | Prospective cohort   |                                        | *                                | *                         | *                                      | *                     | *                     |                        | 5     | Fair           |
| Odawara M, 2014 [58]          | Observational        | *                                      | *                                | *                         | *                                      | *                     | *                     | *                      | 7     | Good           |
| Wei W, 2014 [59]              | Retrospective cohort | *                                      | *                                | *                         | *                                      | *                     | *                     | *                      | 7     | Good           |
| Zhang Y, 2014 [12]            | Observational        |                                        | *                                | *                         | *                                      | *                     | *                     |                        | 5     | Fair           |
| Joshi, 2005 [65]              | Prospective cohort   | *                                      | *                                | *                         | *                                      | *                     | *                     |                        | 6     | Good           |
| Tentolouris N, 2013 [83]      | Retrospective cohort | *                                      | *                                | *                         | *                                      | *                     | *                     |                        | 6     | Good           |
| Delgado E, 2012 [16]          | Comparative          |                                        |                                  |                           | *                                      | *                     | *                     | *                      | 4     | Fair           |
| Bullano, 2006 [38]            | Retrospective cohort | *                                      | *                                | *                         |                                        | *                     | *                     |                        | 5     | Fair           |

Assessment done using Newcastle-Ottawa Scale.

\*Thresholds for converting the Newcastle-Ottawa scales to AHRQ standards (good, fair, and poor) as per: Penson DF, Krishnaswami S, Jules A, et al. Evaluation and Treatment of Cryptorchidism [Internet]. Rockville (MD): Agency for Healthcare Research and Quality (US); 2012 Dec. (Comparative Effectiveness Reviews, No. 88.) Appendix E, Quality of the Literature. Available from: <https://www.ncbi.nlm.nih.gov/books/NBK115843/>

**Table S8:** Primary Outcomes of good quality studies

| Author<br>(Year)                   | Intervention                                 | Mean change in HbA1c<br>(SD if available) |                    | Mean<br>change (SD<br>if available) | Inter-<br>group p-<br>value | Proportion<br>of patients<br>achieving<br>target<br>HbA1c<br>[ n (if<br>available)<br>(%)] | Inter-<br>group p-<br>value | Overall<br>Hypoglycemia*            | Inter-<br>group p-<br>value |
|------------------------------------|----------------------------------------------|-------------------------------------------|--------------------|-------------------------------------|-----------------------------|--------------------------------------------------------------------------------------------|-----------------------------|-------------------------------------|-----------------------------|
|                                    |                                              | Baseline                                  | Post-<br>treatment |                                     |                             |                                                                                            |                             |                                     |                             |
| <b>Gla-100 vs NPH insulin</b>      |                                              |                                           |                    |                                     |                             |                                                                                            |                             |                                     |                             |
| Home PD,<br>2014 [15]              | Gla-100 + OADs                               | 8.2 (0.8)                                 | 7.1 (0.9)          | -1.07 (0.5)                         | -                           | 50.34                                                                                      | -                           | 64.7 vs. 61.1                       | -                           |
|                                    | Insulin NPH + OADs                           | 8.2 (0.9)                                 | 7.2 (1.0)          | -0.97 (0.5)                         |                             | 4.3                                                                                        |                             |                                     |                             |
| <b>Gla-100 vs Premixed insulin</b> |                                              |                                           |                    |                                     |                             |                                                                                            |                             |                                     |                             |
| Sehgal S, 2015<br>[7]              | Human NPH + OADs                             | 10.3                                      | 8.8                | -1.5                                | -                           | -                                                                                          | -                           | 4.8                                 | 0.038                       |
|                                    | Gla-100 OD + OADs                            | 10.9                                      | 8.5                | -2.4                                |                             | -                                                                                          |                             | 16.67                               |                             |
|                                    | Biphasic human premixed insulin + OADs       | 10.7                                      | 8.6                | -2.1                                |                             | -                                                                                          |                             | 7.1                                 |                             |
| Cao Y, 2017<br>[29]                | Gla-100 OD + Sitagliptin 100mg               | 8.07 (0.91)                               | -                  | -1.14                               | -                           | 56.25                                                                                      | -                           | 2.85 vs. 13.3                       | <0.01                       |
|                                    | Insulin Aspart 30 BD                         | 8.23 (0.81)                               | -                  | -0.94                               |                             | 37.5                                                                                       |                             |                                     |                             |
| Buse, 2009<br>[33]                 | Lispro mix 75/25 + OADs                      | 9.1 (1.3)                                 | 7.3 (1.1)          | -1.8 (1.3)                          | 0.005                       | 47.5                                                                                       | <0.001                      | 28 vs. 23.1 episodes /patient/year  | 0.007                       |
|                                    | Gla-100 + OADs                               | 9 (1.2)                                   | 7.2 (1.1)          | -1.7 (1.3)                          |                             | 40.3                                                                                       |                             |                                     |                             |
| Schiel, 2007<br>[34]               | Grp A: Gla-100 OD + Glimepiride OD           | 8.22 (0.69)                               | 7.87 (0.66)        | -0.35 (0.52)                        | -                           | -                                                                                          | -                           | 59 vs 72 vs. 77                     | -                           |
|                                    | Grp B: Gla-100 OD + Glimepiride OD + MET BD  | 8.14 (0.9)                                | 7.44 (0.92)        | -0.69 (0.86)                        |                             | -                                                                                          |                             |                                     |                             |
|                                    | Grp C: Human Premixed Insulin 75/25 or 70/39 | 8.08 (0.84)                               | 7.83 (1.13)        | -0.25 (1.02)                        |                             | -                                                                                          |                             |                                     |                             |
| Robbins, 2007<br>[35]              | Lispro Mix 75/25 BD + MET BD                 | 7.8 (0.9)                                 | 7.1 (0.9)          | -0.7 (0.9)                          | <0.001                      | 56.3                                                                                       | <0.005                      | 0.5 vs. 0.8 episodes /patient/month | -                           |
|                                    | Gla-100 OD + MET BD                          | 7.8 (1)                                   | 7.5 (1.0)          | -0.4 (0.9)                          |                             | 39.7                                                                                       |                             |                                     |                             |



| Author (Year)        | Intervention                                                                          | Mean change in HbA1c (SD if available) |                | Mean change (SD if available) | Inter-group p-value | Proportion of patients achieving target HbA1c [ n (if available) (%)] | Inter-group p-value | Overall Hypoglycemia*                   | Inter-group p-value |
|----------------------|---------------------------------------------------------------------------------------|----------------------------------------|----------------|-------------------------------|---------------------|-----------------------------------------------------------------------|---------------------|-----------------------------------------|---------------------|
|                      |                                                                                       | Baseline                               | Post-treatment |                               |                     |                                                                       |                     |                                         |                     |
| Janka, 2005 [39]     | Gla-100 + OADs (33limepiride + metformin)                                             | 8.85 (0.98)                            | 7.15 (0.90)    | -1.64                         | 0.0003              | 49.4                                                                  | -                   | 4.07 vs. 9.87 events per patient-years  | <0.0001             |
|                      | Human premixed insulin (30% regular, 70%NPH insulin; Insulin Actraphane HM 30/        | 8.83 (0.87)                            | 7.49 (1.09)    | -1.31                         |                     | 39                                                                    |                     |                                         |                     |
| Malone, 2004 [41]    | Lispro Mix 75/25 + MET 1500-2550 mg/day followed by Gla-100 HS + MET 1500-2550 mg/day | 8.7 (1.3)                              | 7.4 (1.1)      | -1.32 (1.01)                  | 0.003               | 42                                                                    | <0.001              | 0.39 vs. 0.68 episodes / patient /month | 0.04                |
|                      | Gla-100 HS + MET 1500-2550 mg/day followed                                            | 8.7 (1.3)                              | 7.8 (1.1)      | -0.93 (0.89)                  |                     | 18                                                                    |                     |                                         |                     |
| Joshi, 2005 [65]     | Premixed insulin analog (Novomix 30) BD                                               | 8.79 (1.13)                            | 7.2 (0.83)     | -1.59                         | <0.05               | 45.61                                                                 | <0.05               | 58.08 vs. 16.07                         | <0.05               |
|                      | Gla-100 OD + Insulin Aspart TID                                                       | 8.53 (1.22)                            | 7.37 (0.83)    | -1.16                         |                     | 32.26                                                                 |                     |                                         |                     |
| Aschner, 2015 [74]   | Gla-100 OD + glulisine OD before main meal + MET ± SU                                 | 8.7 (0.9)                              | 7.2 (0.9)      | -1.48 (0.04)                  | 0.0008              | 43.2                                                                  | <0.005              | 1.20 vs. 3.40 episodes/ PYE             | -                   |
|                      | Premixed insulin BD MET ± SU                                                          | 8.7 (0.9)                              | 7 (0.9)        | -1.64 (0.04)                  |                     | 52.6                                                                  |                     |                                         |                     |
| Tinahones, 2014 [75] | Insulin Lispro Mix BD + MET ± Pioglitazone                                            | 8.7 (0.8)                              | Not mentioned  | -1.3                          | 0.010               | 34.5                                                                  |                     | 16.51 vs. 13.07 episodes / PYE          |                     |

| Author<br>(Year)                                   | Intervention                                                         | Mean change in HbA1c<br>(SD if available) |                    | Mean<br>change (SD<br>if available) | Inter-<br>group p-<br>value | Proportion<br>of patients<br>achieving<br>target<br>HbA1c<br>[ n (if<br>available)<br>(%)] | Inter-<br>group p-<br>value | Overall<br>Hypoglycemia*                      | Inter-<br>group p-<br>value |
|----------------------------------------------------|----------------------------------------------------------------------|-------------------------------------------|--------------------|-------------------------------------|-----------------------------|--------------------------------------------------------------------------------------------|-----------------------------|-----------------------------------------------|-----------------------------|
|                                                    |                                                                      | Baseline                                  | Post-<br>treatment |                                     |                             |                                                                                            |                             |                                               |                             |
|                                                    | Gla-100 OD +<br>Insulin Lispro OD<br>+ MET ±<br>Pioglitazone         | 8.6 (0.7)                                 | Not<br>mentioned   | -1.08                               |                             | 30                                                                                         | -                           |                                               | -                           |
| Tentoluris N,<br>2013 [83]                         | Premixed BD<br>continued                                             | 8.18 (1.33)                               | 7.58 (1.06)        | -0.6                                | <0.001                      | 23.2                                                                                       | -                           | 0.705 vs. 0.757<br>episodes /<br>patient/year | -                           |
|                                                    | Premixed BD<br>switched to Gla-<br>100 OD + rapid-<br>acting insulin | 8.53 (1.29)                               | 7.39 (0.81)        | -1.14                               |                             | 29.6                                                                                       |                             |                                               |                             |
| <b>Gla-100 vs. Second Generation Basal insulin</b> |                                                                      |                                           |                    |                                     |                             |                                                                                            |                             |                                               |                             |
| Bailey, 2019<br>[42]                               | Gla-300 OD +<br>OADs                                                 | 9.59 (1.96)                               | 8.07               | -1.52 (2.08)                        | 0.003                       | 25                                                                                         | 0.029                       | 9.66 vs. 12.45                                | -                           |
|                                                    | Gla-100 OD +<br>OADs                                                 | 9.56 (1.94)                               | 8.26               | -1.3 (2.12)                         |                             | 21.5                                                                                       |                             |                                               |                             |
| Pan 2016 [46]                                      | IDeg 100 OD +<br>MET                                                 | 8.3 (0.9)                                 | 7.0 (0.9)          | -1.3 (1.1)                          | -                           | -                                                                                          | -                           | 85 vs. 97<br>episodes/100PYE                  | -                           |
|                                                    | Gla-100 OD + MET                                                     | 8.3 (0.8)                                 | 7.0 (0.9)          | -1.2 (1)                            |                             | -                                                                                          |                             |                                               |                             |
| Bolli, 2015<br>[48]                                | Gla-300 OD +<br>OADs (previous) -<br>SUs / Glinides                  | 8.49 (1.04)                               | 7.08 (0.96)        | -1.42 (0.05)                        | -                           | 43.1                                                                                       | -                           | 6.4 vs. 8.5<br>events/PYE                     | 0.042                       |
|                                                    | Gla-100 OD +<br>OADs (previous) -<br>SUs / Glinides                  | 8.58 (1.07)                               | 7.05 (0.95)        | -1.46 (0.05)                        |                             | 42.1                                                                                       |                             |                                               |                             |
| Yki-Jarvinen,<br>2014 [49]                         | Gla-300 OD ±<br>OADs                                                 | 8.26 (0.86)                               | 7.57               | -                                   | -                           | 30.4                                                                                       | -                           | 14.37 vs. 18.96<br>episodes / PYE             | -                           |
|                                                    | Gla-100 OD ±<br>OADs                                                 | 8.22 (0.77)                               | 7.56               | -                                   |                             | 30.6                                                                                       |                             |                                               |                             |
| Gough SC,<br>2013 [50]                             | IDeg -200 + MET ±<br>DPP-4 inhibitors                                | 8.3 (1)                                   | -                  | -1.3 (1.01)                         |                             | 52                                                                                         |                             | 1.22 vs. 1.42<br>episodes/PYE                 |                             |

| Author (Year)                             | Intervention                                                     | Mean change in HbA1c (SD if available) |                | Mean change (SD if available) | Inter-group p-value | Proportion of patients achieving target HbA1c [ n (if available) (%) ] | Inter-group p-value | Overall Hypoglycemia*                       | Inter-group p-value |
|-------------------------------------------|------------------------------------------------------------------|----------------------------------------|----------------|-------------------------------|---------------------|------------------------------------------------------------------------|---------------------|---------------------------------------------|---------------------|
|                                           |                                                                  | Baseline                               | Post-treatment |                               |                     |                                                                        |                     |                                             |                     |
|                                           | Gla-100 OD + MET ± DPP-4 inhibitors                              | 8.2 (0.9)                              | -              | -1.3 (1.01)                   | -                   | 56                                                                     | -                   |                                             | -                   |
| Onishi Y, 2013 [51]                       | IDeg OD + OADs minus DPP-4 inhibitors                            | 8.4 (0.8)                              | 7.2            | -1.24                         | -                   | 40.8                                                                   | -                   | 3.0 vs. 3.7 episodes/PYE                    | -                   |
|                                           | Gla-100 OD + OADs minus DPP-4 inhibitors                         | 8.5 (0.8)                              | 7.1            | -1.35                         |                     | 48.6                                                                   |                     |                                             |                     |
| Meneghini L, 2013 [52]                    | IDeg OD Flex                                                     | 8.5 (1)                                | -              | -1.28                         | -                   | 38.9                                                                   | -                   | 3.6 vs. 3.6 vs. 3.5 episodes/ PYE           | -                   |
|                                           | IDeg OD in morning                                               | 8.4 (0.9)                              | -              | -1.07                         |                     | 40.9                                                                   |                     |                                             |                     |
|                                           | Gla-100 OD                                                       | 8.4 (0.9)                              | -              | -1.26                         |                     | 43.9                                                                   |                     |                                             |                     |
| Riddle, 2014 [66]                         | Gla-300 OD + meal-time insulin ± MET                             | 8.15 (0.78)                            | 7.25 (0.85)    | -0.83 (0.06)                  | -                   | 39.6                                                                   | -                   | 26.37 vs. 28.08 episodes / PYE              | -                   |
|                                           | Gla-100 OD + meal-time insulin ± MET                             | 8.16 (0.77)                            | 7.28 (0.92)    | -0.83 (0.06)                  |                     | 40.9                                                                   |                     |                                             |                     |
| <b>Gla-100 vs. Co-formulation insulin</b> |                                                                  |                                        |                |                               |                     |                                                                        |                     |                                             |                     |
| Kumar, 2016 [55]                          | Gla-100 OD + MET                                                 | 8.9 (1)                                | 7.6            | -1.34                         | -                   | 29.7                                                                   | -                   | Treatment ratio is 1.86 in favor of Gla-100 | <0.0001             |
|                                           | IDegAsp OD + MET                                                 | 8.9 (0.9)                              | 7.5            | -1.39                         |                     | 33.1                                                                   |                     |                                             |                     |
| Onishi Y, 2013 [56]                       | IDegAsp + OADs (previous) minus DPP-4 Inhibitors / SU / Glinides | 8.3 (0.8)                              | 7 (0.8)        | -1.4 (0.9)                    | -                   | -                                                                      | -                   | 1.91 vs. 2.71 episodes/ PYE                 | -                   |
|                                           | Gla-100 OD + OADs (previous) minus DPP-4                         | 8.5 (0.8)                              | 7.3 (0.9)      | -1.2 (1)                      |                     | -                                                                      |                     |                                             |                     |

| Author<br>(Year)                       | Intervention                                        | Mean change in HbA1c<br>(SD if available) |                    | Mean<br>change (SD<br>if available) | Inter-<br>group p-<br>value                                            | Proportion<br>of patients<br>achieving<br>target<br>HbA1c<br>[ n (if<br>available)<br>(%)] | Inter-<br>group p-<br>value | Overall<br>Hypoglycemia*                                                 | Inter-<br>group p-<br>value |
|----------------------------------------|-----------------------------------------------------|-------------------------------------------|--------------------|-------------------------------------|------------------------------------------------------------------------|--------------------------------------------------------------------------------------------|-----------------------------|--------------------------------------------------------------------------|-----------------------------|
|                                        |                                                     | Baseline                                  | Post-<br>treatment |                                     |                                                                        |                                                                                            |                             |                                                                          |                             |
|                                        | Inhibitors / SU /<br>Glinides                       |                                           |                    |                                     |                                                                        |                                                                                            |                             |                                                                          |                             |
| <b>Gla-100 vs. Other Basal insulin</b> |                                                     |                                           |                    |                                     |                                                                        |                                                                                            |                             |                                                                          |                             |
| Rosenstock,<br>2008 [9]                | IDet OD + OADs                                      | 8.64 (0.78)                               | 7.16 (0.08)        | -                                   | -                                                                      | 52                                                                                         | -                           | 5.8 vs. 6.2<br>episodes/patient-<br>year                                 | -                           |
|                                        | Gla-100 OD +<br>OADs                                | 8.62 (0.77)                               | 7.12 (0.08)        | -                                   |                                                                        | 52                                                                                         |                             |                                                                          |                             |
| Odawara M,<br>2014 [58]                | Gla-100 OD +<br>OADs (insulin-<br>naive)            | 9.53 (1.19)                               | 8.07 (1.2!)        | -                                   | -                                                                      | -                                                                                          | -                           | -                                                                        | -                           |
|                                        | Gla-100 OD +<br>OADs (insulin non-<br>naive)        | 9.08 (1.11)                               | 8.46 (1.39)        | -                                   |                                                                        | -                                                                                          |                             | -                                                                        |                             |
| Wei W, 2014<br>[59]                    | Cohort 1 - Gla-C<br>Impact Gla-100 OD<br>continued  | 8.6 (1.7)                                 | 8.35               | -0.13                               | <0.05 for Gla-<br>100 and Det<br>comparison in<br>favor of Gla-<br>100 | 19.4                                                                                       | -                           | 0.30 vs. 0.37 vs.<br>0.37 vs. 0.41 vs.<br>0.26 vs. 0.21<br>episodes /PYE | -                           |
|                                        | Cohort 1 - Det-S<br>Impact (Det OD<br>switched)     | 8.7 (1.7)                                 | 8.64               | -0.06                               |                                                                        | 19.8                                                                                       |                             |                                                                          |                             |
|                                        | Cohort 1 - Gla-C<br>Huma- (Gla-100 OD<br>continued) | 8.2 (1.5)                                 | 8.04               | -0.14                               |                                                                        | 25.8                                                                                       |                             |                                                                          |                             |
|                                        | Cohort 1 - Det-S<br>Huma- (Det OD<br>switched)      | 8.3 (1.5)                                 | 8.31               | 0                                   |                                                                        | 17.8                                                                                       |                             |                                                                          |                             |
|                                        | Cohort 2 - Det-C<br>Impact (Det OD<br>continued)    | 8.9 (1.8)                                 | 8.54               | -0.68                               |                                                                        | 16.9                                                                                       |                             |                                                                          |                             |
|                                        | Cohort 2 - Gla-S<br>Impact (Gla-100 OD<br>switched) | 9.1 (1.9)                                 | 8.34               | -0.36                               |                                                                        | 19.1                                                                                       |                             |                                                                          |                             |
|                                        | IDet OD + MET                                       | 7.96 (0.62)                               | 7.48 (0.91)        | -0.48 (0.94)                        |                                                                        | 38                                                                                         | 0.026                       |                                                                          |                             |

| Author<br>(Year)          | Intervention                                                            | Mean change in HbA1c<br>(SD if available) |                    | Mean<br>change (SD<br>if available) | Inter-<br>group p-<br>value | Proportion<br>of patients<br>achieving<br>target<br>HbA1c<br>[ n (if<br>available)<br>(%)] | Inter-<br>group p-<br>value | Overall<br>Hypoglycemia*        | Inter-<br>group p-<br>value |
|---------------------------|-------------------------------------------------------------------------|-------------------------------------------|--------------------|-------------------------------------|-----------------------------|--------------------------------------------------------------------------------------------|-----------------------------|---------------------------------|-----------------------------|
|                           |                                                                         | Baseline                                  | Post-<br>treatment |                                     |                             |                                                                                            |                             |                                 |                             |
| Meneghini L,<br>2013 [60] | Gla-100 OD +<br>MET                                                     | 7.86 (0.58)                               | 7.13 (0.72)        | -0.74 (0.76)                        | -                           | 53                                                                                         | -                           | 3.19 vs. 4.41<br>episodes / PYE | 0.034                       |
| Esposito, 2008<br>[61]    | Human NPL OD<br>+OADs minus<br>night-time SU,<br>replaced with MET      | 8.8 (0.7)                                 | -                  | -1.83                               | -                           | 62                                                                                         | -                           | 7.5 vs. 6.0<br>episodes/PYE     | -                           |
|                           | Gla-100 OD<br>+OADs minus<br>night-time SU,<br>replaced with MET        | 8.7 (0.7)                                 | -                  | -1.89                               |                             | 64                                                                                         |                             |                                 |                             |
| Rosenstock,<br>2008 [76]  | Prandial<br>premixed (insulin<br>lispro protamine<br>suspension/lispro) | 8.83 (1.04)                               | 6.95               | -2.09                               | 0.021                       | 54                                                                                         | <0.05                       | 48.70 vs. 51.20                 | -                           |
|                           | Gla-100 OD +<br>Insulin Lispro<br>TID +OADs<br>(minus SU +<br>Glinides) | 8.89 (1.09)                               | 6.78               | -1.87                               |                             | 69                                                                                         |                             |                                 |                             |
